# Supplementary material for: Origin determination of the Eastern oyster (Crassostrea virginica) using a combination of whole-body compound-specific isotope analysis and heavy metal analysis
Source: Royal Society of Chemistry journal article supplement (doi:10.1039/d1ay00755f), 2021-01-01
Supplement: d1ay00755f1.pdf [file d1ay00755f1.pdf]

Supplementary Information for

**Origin determination of the Eastern oyster (*Crassostrea virginica*) using a combination of whole-body compound-specific isotope analysis and heavy metal analysis**

Mayara P. V. Matos,<sup>a,c</sup> Marc E. Engel,<sup>b</sup> John B. Mangrum<sup>c</sup> and Glen P. Jackson<sup>\*d,e</sup>

<sup>a</sup> Joint Institute for Food Safety and Applied Nutrition, University of Maryland, Maryland, USA

<sup>b</sup> Department of Chemistry, Vancouver Island University, Nanaimo, Canada

<sup>c</sup> Center for Food Safety and Applied Nutrition, U.S. Food and Drug Administration, College Park, MD

<sup>d</sup> Department of Forensic and Investigative Science, West Virginia University, Morgantown, WV

<sup>e</sup> C. Eugene Bennett Department of Chemistry, West Virginia University, Morgantown, WV

\* Corresponding author: [glen.jackson@mail.wvu.edu](mailto:glen.jackson@mail.wvu.edu)

**This file includes:**

Tables S1-S6

**Table S1.** One-way ANOVA of bulk  $\delta^{13}\text{C}$  and  $\delta^{15}\text{N}$  values of oyster samples from five different harvest areas.  $n = 9$  or  $10$  for each region.

| ANOVA                 |                |                |    |             |        |         |
|-----------------------|----------------|----------------|----|-------------|--------|---------|
|                       |                | Sum of Squares | df | Mean Square | F      | Sig.    |
| $\delta^{13}\text{C}$ | Between Groups | 46.414         | 4  | 11.604      | 6.011  | .001    |
|                       | Within Groups  | 84.931         | 44 | 1.930       |        |         |
|                       | Total          | 131.345        | 48 |             |        |         |
| $\delta^{15}\text{N}$ | Between Groups | 282.358        | 4  | 70.589      | 18.443 | 6.84e-9 |
|                       | Within Groups  | 164.579        | 43 | 3.827       |        |         |
|                       | Total          | 446.937        | 47 |             |        |         |

**Table S2.** One-way ANOVA followed by Tukey’s HSD post-hoc test of of bulk  $\delta^{13}\text{C}$  and  $\delta^{15}\text{N}$  values of oyster samples revealed which samples could be statistically discriminated from one region to another. Values statistically significant above 90% confidence level are highlighted in bold letters with an asterisk symbol.  $n = 9$  or  $10$  for each region.

| Multiple Comparisons  |                  |                  |                       |            |              |                                                    |      |
|-----------------------|------------------|------------------|-----------------------|------------|--------------|----------------------------------------------------|------|
| Tukey HSD             |                  |                  |                       |            |              |                                                    |      |
| Dependent Variable    | (I) Harvest Area | (J) Harvest Area | Mean Difference (I-J) | Std. Error | Sig.         | 95% Confidence Interval<br>Lower Bound Upper Bound |      |
| $\delta^{13}\text{C}$ | FL 1642          | FL 1662          | 1.73                  | .62        | <b>.059*</b> | -.041                                              | 3.49 |
|                       |                  | LA 28            | 2.60*                 | .62        | <b>.001*</b> | .83                                                | 4.36 |
|                       |                  | Galveston Bay    | .52                   | .62        | .927         | -1.27                                              | 2.27 |
|                       |                  | Copano Bay       | .39                   | .64        | .972         | -1.42                                              | 2.21 |
|                       | FL 1662          | FL 1642          | -1.73                 | .62        | <b>.059*</b> | -3.49                                              | .041 |
|                       |                  | LA 28            | .87                   | .62        | .630         | -.90                                               | 2.64 |
|                       |                  | Galveston Bay    | -1.22                 | .62        | .297         | -2.99                                              | .54  |
|                       |                  | Copano Bay       | -1.33                 | .64        | .242         | -3.15                                              | .48  |
|                       | LA 28            | FL 1642          | -2.60*                | .62        | <b>.001*</b> | -4.36                                              | -.83 |
|                       |                  | FL 1662          | -.87                  | .62        | .630         | -2.64                                              | .90  |
|                       |                  | Galveston Bay    | -2.10*                | .62        | <b>.013*</b> | -3.86                                              | -.33 |
|                       |                  | Copano Bay       | -2.21*                | .64        | <b>.010*</b> | -4.02                                              | -.39 |
|                       | Galveston Bay    | FL 1642          | -.50                  | .62        | .927         | -2.27                                              | 1.27 |
|                       |                  | FL 1662          | 1.22                  | .62        | .297         | -.53                                               | 2.99 |
|                       |                  | LA 28            | 2.09*                 | .62        | <b>.013*</b> | .33                                                | 3.90 |
|                       |                  | Copano Bay       | -.11                  | .64        | 1.000        | -1.93                                              | 1.70 |
|                       | Copano Bay       | FL 1642          | -.39                  | .64        | .972         | -2.21                                              | 1.42 |
|                       |                  | FL 1662          | 1.33                  | .64        | .242         | -.48                                               | 3.15 |
|                       |                  | LA 28            | 2.21*                 | .64        | <b>.010*</b> | .39                                                | 4.02 |
|                       |                  | Galveston Bay    | .11                   | .64        | 1.000        | -1.70                                              | 1.93 |

| $\delta^{15}\text{N}$ |               |               |           |      |              |       |       |
|-----------------------|---------------|---------------|-----------|------|--------------|-------|-------|
|                       | FL 1642       | FL 1662       | -0.19     | .90  | 1.000        | -2.75 | 2.37  |
|                       |               | LA 28         | -0.98     | .87  | .795         | -3.47 | 1.51  |
|                       |               | Galveston Bay | -6.24*    | .87  | <b>.000*</b> | -8.73 | -3.75 |
|                       |               | Copano Bay    | -0.12     | .904 | 1.000        | -2.68 | 2.43  |
|                       | FL 1662       | FL 1642       | 0.19      | .90  | 1.000        | -2.37 | 2.74  |
|                       |               | LA 28         | -0.79     | .90  | .902         | -3.35 | 1.77  |
|                       |               | Galveston Bay | -6.05*    | .90  | <b>.000*</b> | -8.61 | -3.49 |
|                       |               | Copano Bay    | 0.06      | .92  | 1.000        | -2.56 | 2.69  |
|                       | LA 28         | FL 1642       | 0.98      | .87  | .795         | -1.51 | 3.47  |
|                       |               | FL 1662       | 0.79      | .90  | .902         | -1.77 | 3.35  |
|                       |               | Galveston Bay | -5.26*    | .87  | <b>.000*</b> | -7.75 | -2.77 |
|                       |               | Copano Bay    | 0.86      | .90  | .874         | -1.70 | 3.42  |
|                       | Galveston Bay | FL 1642       | 6.24*     | .87  | <b>.000*</b> | 3.75  | 8.73  |
|                       |               | FL 1662       | 6.05*     | .90  | <b>.000*</b> | 3.49  | 8.61  |
|                       |               | LA 28         | 5.26*     | .87  | <b>.000*</b> | 2.77  | 7.75  |
|                       |               | Copano Bay    | 6.117522* | .90  | <b>.000*</b> | 3.56  | 8.68  |
|                       | Copano Bay    | FL 1642       | 0.12      | .90  | 1.000        | -2.43 | 2.68  |
|                       |               | FL 1662       | -0.06     | .92  | 1.000        | -2.69 | 2.56  |
|                       |               | LA 28         | -0.857    | .90  | .874         | -3.42 | 1.70  |
|                       |               | Galveston Bay | -6.12*    | .90  | <b>.000*</b> | -8.68 | -3.56 |

**Table S3.** Linear discriminant analysis (classification) according to geographic origin using bulk  $\delta^{13}\text{C}$  and  $\delta^{15}\text{N}$  values from whole-body oyster samples collected in five different harvest areas.  $n = 9$  or  $10$  for each region.

|                              |       | Harvest Area  | Predicted Group Membership |         |       |               |            | Total |
|------------------------------|-------|---------------|----------------------------|---------|-------|---------------|------------|-------|
|                              |       |               | FL 1642                    | FL 1662 | LA 28 | Galveston Bay | Copano Bay |       |
| Original                     | Count | FL 1642       | 8                          | 0       | 0     | 0             | 2          | 10    |
|                              |       | FL 1662       | 0                          | 2       | 4     | 0             | 3          | 9     |
|                              |       | LA 28         | 0                          | 3       | 7     | 0             | 0          | 10    |
|                              |       | Galveston Bay | 0                          | 1       | 1     | 8             | 0          | 10    |
|                              |       | Copano Bay    | 5                          | 1       | 1     | 0             | 2          | 9     |
|                              | %     | FL 1642       | 80.0                       | .0      | .0    | .0            | 20.0       | 100.0 |
|                              |       | FL 1662       | .0                         | 22.2    | 44.4  | .0            | 33.3       | 100.0 |
|                              |       | LA 28         | .0                         | 30.0    | 70.0  | .0            | .0         | 100.0 |
|                              |       | Galveston Bay | .0                         | 10.0    | 10.0  | 80.0          | .0         | 100.0 |
|                              |       | Copano Bay    | 55.6                       | 11.1    | 11.1  | .0            | 22.2       | 100.0 |
| Cross-validated <sup>b</sup> | Count | FL 1642       | 8                          | 0       | 0     | 0             | 2          | 10    |
|                              |       | FL 1662       | 0                          | 2       | 4     | 0             | 3          | 9     |
|                              |       | LA 28         | 0                          | 3       | 6     | 0             | 1          | 10    |
|                              |       | Galveston Bay | 0                          | 1       | 1     | 8             | 0          | 10    |
|                              |       | Copano Bay    | 5                          | 1       | 1     | 0             | 2          | 9     |
|                              | %     | FL 1642       | 80.0                       | .0      | .0    | .0            | 20.0       | 100.0 |
|                              |       | FL 1662       | .0                         | 22.2    | 44.4  | .0            | 33.3       | 100.0 |
|                              |       | LA 28         | .0                         | 30.0    | 60.0  | .0            | 10.0       | 100.0 |
|                              |       | Galveston Bay | .0                         | 10.0    | 10.0  | 80.0          | .0         | 100.0 |
|                              |       | Copano Bay    | 55.6                       | 11.1    | 11.1  | .0            | 22.2       | 100.0 |

a. 56.3% of original grouped cases correctly classified.

b. Cross validation is done only for those cases in the analysis. In cross validation, each case is classified by the functions derived from all cases other than that case.

c. 54.2% of cross-validated grouped cases correctly classified.

**Table S4.** Multivariate analysis of variance (MANOVA) followed by Games-Howell post-hoc test of  $\delta^{13}\text{C}$  values of Asx, Glx, Ser and Gly and metal concentrations from oyster samples. The comparisons revealed which samples could be statistically discriminated from one region to another. Values statistically significant above 90% confidence level are highlighted in bold letters with an asterisk symbol.  $n = 9$  or  $10$  for each region.

| <b>Multiple Comparisons</b> |                 |                 |                  |            |              |                         |             |
|-----------------------------|-----------------|-----------------|------------------|------------|--------------|-------------------------|-------------|
| Games-Howell                |                 |                 |                  |            |              |                         |             |
| Dependent Variable          | (I) Region code | (J) Region code | Mean             |            | Sig.         | 95% Confidence Interval |             |
|                             |                 |                 | Difference (I-J) | Std. Error |              | Lower Bound             | Upper Bound |
| $\delta^{13}\text{C}$ ASX   | FL 1642         | FL 1662         | .52188           | 1.970201   | .999         | -5.67631                | 6.72007     |
|                             |                 | LA 28           | .87654           | 2.116076   | .993         | -5.82711                | 7.58018     |
|                             |                 | Galveston Bay   | 2.97837          | 1.073853   | <b>.086*</b> | -.31019                 | 6.26693     |
|                             |                 | Copano Bay      | 3.27063*         | 1.024258   | <b>.041*</b> | .10612                  | 6.43513     |
|                             | FL 1662         | FL 1642         | -.52188          | 1.970201   | .999         | -6.72007                | 5.67631     |
|                             |                 | LA 28           | .35465           | 2.619062   | 1.000        | -7.57112                | 8.28042     |
|                             |                 | Galveston Bay   | 2.45649          | 1.880124   | .693         | -3.59976                | 8.51273     |
|                             |                 | Copano Bay      | 2.74874          | 1.852245   | .592         | -3.27171                | 8.76919     |
|                             | LA 28           | FL 1642         | -.87654          | 2.116076   | .993         | -7.58018                | 5.82711     |
|                             |                 | FL 1662         | -.35465          | 2.619062   | 1.000        | -8.28042                | 7.57112     |
|                             |                 | Galveston Bay   | 2.10183          | 2.032474   | .835         | -4.48086                | 8.68453     |
|                             |                 | Copano Bay      | 2.39409          | 2.006713   | .755         | -4.15830                | 8.94648     |
|                             | Galveston Bay   | FL 1642         | -2.97837         | 1.073853   | <b>.086*</b> | -6.26693                | .31019      |
|                             |                 | FL 1662         | -2.45649         | 1.880124   | .693         | -8.51273                | 3.59976     |
|                             |                 | LA 28           | -2.10183         | 2.032474   | .835         | -8.68453                | 4.48086     |
|                             |                 | Copano Bay      | .29226           | .838021    | .996         | -2.28184                | 2.86635     |
|                             | Copano Bay      | FL 1642         | -3.27063*        | 1.024258   | <b>.041*</b> | -6.43513                | -.10612     |
|                             |                 | FL 1662         | -2.74874         | 1.852245   | .592         | -8.76919                | 3.27171     |
|                             |                 | LA 28           | -2.39409         | 2.006713   | .755         | -8.94648                | 4.15830     |

|                           |               |               |           |          |              |          |          |
|---------------------------|---------------|---------------|-----------|----------|--------------|----------|----------|
| $\delta^{13}\text{C}$ GLX | FL 1642       | Galveston Bay | -0.29226  | .838021  | .996         | -2.86635 | 2.28184  |
|                           |               | FL 1662       | 1.61398   | .766909  | .273         | -.78742  | 4.01538  |
|                           |               | LA 28         | 1.42252   | 1.385051 | .838         | -3.11490 | 5.95995  |
|                           |               | Galveston Bay | .27317    | .627749  | .992         | -1.67595 | 2.22228  |
|                           |               | Copano Bay    | -1.19566  | .511625  | .182         | -2.75425 | .36293   |
|                           | FL 1662       | FL 1642       | -1.61398  | .766909  | .273         | -4.01538 | .78742   |
|                           |               | LA 28         | -.19146   | 1.502449 | 1.000        | -4.90353 | 4.52062  |
|                           |               | Galveston Bay | -1.34081  | .856187  | .538         | -3.95808 | 1.27646  |
|                           |               | Copano Bay    | -2.80964* | .775079  | <b>.020*</b> | -5.23048 | -.38879  |
|                           | LA 28         | FL 1642       | -1.42252  | 1.385051 | .838         | -5.95995 | 3.11490  |
|                           |               | FL 1662       | .19146    | 1.502449 | 1.000        | -4.52062 | 4.90353  |
|                           |               | Galveston Bay | -1.14936  | 1.436410 | .925         | -5.75224 | 3.45352  |
|                           |               | Copano Bay    | -2.61818  | 1.389591 | .382         | -7.16084 | 1.92448  |
|                           | Galveston Bay | FL 1642       | -.27317   | .627749  | .992         | -2.22228 | 1.67595  |
|                           |               | FL 1662       | 1.34081   | .856187  | .538         | -1.27646 | 3.95808  |
|                           |               | LA 28         | 1.14936   | 1.436410 | .925         | -3.45352 | 5.75224  |
|                           |               | Copano Bay    | -1.46883  | .637706  | .199         | -3.44718 | .50952   |
|                           | Copano Bay    | FL 1642       | 1.19566   | .511625  | .182         | -.36293  | 2.75425  |
|                           |               | FL 1662       | 2.80964*  | .775079  | <b>.020*</b> | .38879   | 5.23048  |
|                           |               | LA 28         | 2.61818   | 1.389591 | .382         | -1.92448 | 7.16084  |
| Galveston Bay             |               | 1.46883       | .637706   | .199     | -.50952      | 3.44718  |          |
| $\delta^{13}\text{C}$ SER | FL 1642       | FL 1662       | 4.21699*  | 1.203442 | <b>.021*</b> | .52954   | 7.90443  |
|                           |               | LA 28         | 1.99016   | 1.044047 | .350         | -1.17363 | 5.15396  |
|                           |               | Galveston Bay | 6.52686   | 2.116339 | <b>.070*</b> | -.45848  | 13.51221 |
|                           |               | Copano Bay    | 4.83173*  | .911405  | <b>.000*</b> | 2.05749  | 7.60597  |
|                           | FL 1662       | FL 1642       | -4.21699* | 1.203442 | <b>.021*</b> | -7.90443 | -.52954  |
|                           |               | LA 28         | -2.22682  | 1.266758 | .427         | -6.07728 | 1.62363  |

|                           |               |               |           |          |              |           |          |
|---------------------------|---------------|---------------|-----------|----------|--------------|-----------|----------|
|                           |               | Galveston Bay | 2.30987   | 2.234621 | .835         | -4.83536  | 9.45511  |
|                           |               | Copano Bay    | .61474    | 1.159871 | .983         | -2.97783  | 4.20730  |
|                           | LA 28         | FL 1642       | -1.99016  | 1.044047 | .350         | -5.15396  | 1.17363  |
|                           |               | FL 1662       | 2.22682   | 1.266758 | .427         | -1.62363  | 6.07728  |
|                           |               | Galveston Bay | 4.53670   | 2.152973 | .286         | -2.48986  | 11.56326 |
|                           |               | Copano Bay    | 2.84156   | .993510  | <b>.073*</b> | -.19521   | 5.87834  |
|                           | Galveston Bay | FL 1642       | -6.52686  | 2.116339 | <b>.070*</b> | -13.51221 | .45848   |
|                           |               | FL 1662       | -2.30987  | 2.234621 | .835         | -9.45511  | 4.83536  |
|                           |               | LA 28         | -4.53670  | 2.152973 | .286         | -11.56326 | 2.48986  |
|                           |               | Copano Bay    | -1.69514  | 2.091870 | .921         | -8.65912  | 5.26885  |
|                           | Copano Bay    | FL 1642       | -4.83173* | .911405  | <b>.000*</b> | -7.60597  | -2.05749 |
|                           |               | FL 1662       | -.61474   | 1.159871 | .983         | -4.20730  | 2.97783  |
|                           |               | LA 28         | -2.84156  | .993510  | <b>.073*</b> | -5.87834  | .19521   |
|                           |               | Galveston Bay | 1.69514   | 2.091870 | .921         | -5.26885  | 8.65912  |
| $\delta^{13}\text{C GLY}$ | FL 1642       | FL 1662       | 2.72509   | .947539  | <b>.067*</b> | -.14124   | 5.59142  |
|                           |               | LA 28         | 1.89280   | .807182  | .185         | -.60370   | 4.38931  |
|                           |               | Galveston Bay | -.05377   | 1.201490 | 1.000        | -3.77453  | 3.66699  |
|                           |               | Copano Bay    | -.65616   | 1.324504 | .986         | -4.80731  | 3.49499  |
|                           | FL 1662       | FL 1642       | -2.72509  | .947539  | <b>.067*</b> | -5.59142  | .14124   |
|                           |               | LA 28         | -.83228   | .771743  | .815         | -3.20811  | 1.54354  |
|                           |               | Galveston Bay | -2.77886  | 1.177975 | .183         | -6.44560  | .88789   |
|                           |               | Copano Bay    | -3.38125  | 1.303210 | .129         | -7.48948  | .72698   |
|                           | LA 28         | FL 1642       | -1.89280  | .807182  | .185         | -4.38931  | .60370   |
|                           |               | FL 1662       | .83228    | .771743  | .815         | -1.54354  | 3.20811  |
|                           |               | Galveston Bay | -1.94657  | 1.068334 | .410         | -5.41065  | 1.51750  |
|                           |               | Copano Bay    | -2.54896  | 1.205018 | .284         | -6.50216  | 1.40423  |
|                           | Galveston Bay | FL 1642       | .05377    | 1.201490 | 1.000        | -3.66699  | 3.77453  |



|                  |               |               |         |          |       |          |         |
|------------------|---------------|---------------|---------|----------|-------|----------|---------|
|                  |               | FL 1662       | 2.77886 | 1.177975 | .183  | -.88789  | 6.44560 |
|                  |               | LA 28         | 1.94657 | 1.068334 | .410  | -1.51750 | 5.41065 |
|                  |               | Copano Bay    | -.60239 | 1.498034 | .994  | -5.20229 | 3.99751 |
|                  | Copano Bay    | FL 1642       | .65616  | 1.324504 | .986  | -3.49499 | 4.80731 |
|                  |               | FL 1662       | 3.38125 | 1.303210 | .129  | -.72698  | 7.48948 |
|                  |               | LA 28         | 2.54896 | 1.205018 | .284  | -1.40423 | 6.50216 |
|                  |               | Galveston Bay | .60239  | 1.498034 | .994  | -3.99751 | 5.20229 |
| Pb concentration | FL 1642       | FL 1662       | -.07550 | .057002  | .682  | -.25385  | .10285  |
|                  |               | LA 28         | -.06576 | .038411  | .452  | -.18194  | .05042  |
|                  |               | Galveston Bay | -.00243 | .031470  | 1.000 | -.09952  | .09465  |
|                  |               | Copano Bay    | -.01010 | .032568  | .998  | -.10993  | .08973  |
|                  | FL 1662       | FL 1642       | .07550  | .057002  | .682  | -.10285  | .25385  |
|                  |               | LA 28         | .00974  | .057680  | 1.000 | -.16996  | .18944  |
|                  |               | Galveston Bay | .07307  | .053310  | .657  | -.09930  | .24544  |
|                  |               | Copano Bay    | .06540  | .053965  | .745  | -.10787  | .23867  |
|                  | LA 28         | FL 1642       | .06576  | .038411  | .452  | -.05042  | .18194  |
|                  |               | FL 1662       | -.00974 | .057680  | 1.000 | -.18944  | .16996  |
|                  |               | Galveston Bay | .06333  | .032682  | .341  | -.03786  | .16451  |
|                  |               | Copano Bay    | .05566  | .033740  | .490  | -.04807  | .15939  |
|                  | Galveston Bay | FL 1642       | .00243  | .031470  | 1.000 | -.09465  | .09952  |
|                  |               | FL 1662       | -.07307 | .053310  | .657  | -.24544  | .09930  |
|                  |               | LA 28         | -.06333 | .032682  | .341  | -.16451  | .03786  |
|                  |               | Copano Bay    | -.00767 | .025560  | .998  | -.08608  | .07075  |
|                  | Copano Bay    | FL 1642       | .01010  | .032568  | .998  | -.08973  | .10993  |
|                  |               | FL 1662       | -.06540 | .053965  | .745  | -.23867  | .10787  |
|                  |               | LA 28         | -.05566 | .033740  | .490  | -.15939  | .04807  |
|                  |               | Galveston Bay | .00767  | .025560  | .998  | -.07075  | .08608  |

|                  |               |               |          |         |              |          |         |
|------------------|---------------|---------------|----------|---------|--------------|----------|---------|
| Cd concentration | FL 1642       | FL 1662       | -.00180  | .066226 | 1.000        | -.20235  | .19875  |
|                  |               | LA 28         | -.57660* | .119715 | <b>.003*</b> | -.95953  | -.19367 |
|                  |               | Galveston Bay | -.22139  | .100460 | .244         | -.54309  | .10031  |
|                  |               | Copano Bay    | -.52372  | .254868 | .319         | -1.39189 | .34445  |
|                  | FL 1662       | FL 1642       | .00180   | .066226 | 1.000        | -.19875  | .20235  |
|                  |               | LA 28         | -.57480* | .121862 | <b>.003*</b> | -.96111  | -.18849 |
|                  |               | Galveston Bay | -.21959  | .103009 | .266         | -.54573  | .10656  |
|                  |               | Copano Bay    | -.52192  | .255884 | .324         | -1.39051 | .34666  |
|                  | LA 28         | FL 1642       | .57660*  | .119715 | <b>.003*</b> | .19367   | .95953  |
|                  |               | FL 1662       | .57480*  | .121862 | <b>.003*</b> | .18849   | .96111  |
|                  |               | Galveston Bay | .35521   | .143376 | .143         | -.08206  | .79249  |
|                  |               | Copano Bay    | .05288   | .274631 | 1.000        | -.83422  | .93998  |
|                  | Galveston Bay | FL 1642       | .22139   | .100460 | .244         | -.10031  | .54309  |
|                  |               | FL 1662       | .21959   | .103009 | .266         | -.10656  | .54573  |
|                  |               | LA 28         | -.35521  | .143376 | .143         | -.79249  | .08206  |
|                  |               | Copano Bay    | -.30233  | .266801 | .786         | -1.17977 | .57510  |
|                  | Copano Bay    | FL 1642       | .52372   | .254868 | .319         | -.34445  | 1.39189 |
|                  |               | FL 1662       | .52192   | .255884 | .324         | -.34666  | 1.39051 |
|                  |               | LA 28         | -.05288  | .274631 | 1.000        | -.93998  | .83422  |
|                  |               | Galveston Bay | .30233   | .266801 | .786         | -.57510  | 1.17977 |

Based on observed means.

The error term is Mean Square (Error) = 0.154.

**Table S5.** Regression analysis model using oyster harvesting regions as dependent variable and the  $\delta^{13}\text{C}$  values of Asx, Glx, Ser, Gly and metal concentrations as predictors. The BCa confidence intervals excluding the value zero indicate which variables are significantly different between regions at the 95% confidence interval.

| <b>Bootstrap for Coefficients</b> |                           |       |            |                        |                             |              |              |
|-----------------------------------|---------------------------|-------|------------|------------------------|-----------------------------|--------------|--------------|
| Model                             | B                         | Bias  | Std. Error | Bootstrap <sup>a</sup> |                             |              |              |
|                                   |                           |       |            | Sig. (2-tailed)        | BCa 95% Confidence Interval |              |              |
|                                   |                           |       |            |                        | Lower                       | Upper        |              |
| 1                                 | (Constant)                | 1.173 | -.223      | 2.010                  | .545                        | -2.727       | 4.647        |
|                                   | Pb                        | .450  | .205       | 1.521                  | .730                        | -2.607       | 4.873        |
|                                   | Cd                        | 1.166 | .054       | .433                   | .007                        | <b>.454</b>  | <b>2.277</b> |
|                                   | $\delta^{13}\text{C}$ ASX | -.056 | -.010      | .048                   | .169                        | <b>-.159</b> | <b>-.002</b> |
|                                   | $\delta^{13}\text{C}$ GLX | .088  | -.004      | .087                   | .264                        | -.098        | .253         |
|                                   | $\delta^{13}\text{C}$ SER | -.157 | .001       | .042                   | .002                        | <b>-.252</b> | <b>-.074</b> |
|                                   | $\delta^{13}\text{C}$ GLY | .031  | .011       | .082                   | .692                        | -.122        | .238         |

a. Unless otherwise noted, bootstrap results are based on 2000 bootstrap samples

**Table S6.** Multivariate Analysis of variance (MANOVA) of various variables using the harvesting areas FL 1642 and FL 1662 as the fixed factor. Five amino acids exceeding 95% confidence are shown in bold letters with an asterisk symbol.

|                                             |                       | Sum of Squares | df        | Mean Square   | F             | Sig.         |
|---------------------------------------------|-----------------------|----------------|-----------|---------------|---------------|--------------|
| Pb concentration                            | Between Groups        | .029           | 1         | .029          | 1.754         | .202         |
|                                             | Within Groups         | .292           | 18        | .016          |               |              |
|                                             | Total                 | .321           | 19        |               |               |              |
| Cd concentration                            | Between Groups        | .000           | 1         | .000          | .001          | .979         |
|                                             | Within Groups         | .395           | 18        | .022          |               |              |
|                                             | Total                 | .395           | 19        |               |               |              |
| $\delta^{13}\text{C}$ ASX                   | Between Groups        | 1.362          | 1         | 1.362         | .070          | .794         |
|                                             | Within Groups         | 349.352        | 18        | 19.408        |               |              |
|                                             | Total                 | 350.714        | 19        |               |               |              |
| $\delta^{13}\text{C}$ GLX                   | Between Groups        | 13.025         | 1         | 13.025        | 4.429         | .050         |
|                                             | Within Groups         | 52.933         | 18        | 2.941         |               |              |
|                                             | Total                 | 65.958         | 19        |               |               |              |
| <b><math>\delta^{13}\text{C}</math> SER</b> | <b>Between Groups</b> | <b>88.915</b>  | <b>1</b>  | <b>88.915</b> | <b>12.279</b> | <b>.003*</b> |
|                                             | <b>Within Groups</b>  | <b>130.345</b> | <b>18</b> | <b>7.241</b>  |               |              |
|                                             | <b>Total</b>          | <b>219.259</b> | <b>19</b> |               |               |              |
| <b><math>\delta^{13}\text{C}</math> GLY</b> | <b>Between Groups</b> | <b>37.131</b>  | <b>1</b>  | <b>37.131</b> | <b>8.271</b>  | <b>.010*</b> |
|                                             | <b>Within Groups</b>  | <b>80.805</b>  | <b>18</b> | <b>4.489</b>  |               |              |
|                                             | <b>Total</b>          | <b>117.935</b> | <b>19</b> |               |               |              |
| <b><math>\delta^{13}\text{C}</math> VAL</b> | <b>Between Groups</b> | <b>21.221</b>  | <b>1</b>  | <b>21.221</b> | <b>7.639</b>  | <b>.013*</b> |
|                                             | <b>Within Groups</b>  | <b>50.001</b>  | <b>18</b> | <b>2.778</b>  |               |              |
|                                             | <b>Total</b>          | <b>71.222</b>  | <b>19</b> |               |               |              |
| $\delta^{13}\text{C}$ XLE                   | Between Groups        | 13.286         | 1         | 13.286        | 4.016         | .060         |
|                                             | Within Groups         | 59.546         | 18        | 3.308         |               |              |

|                           |                       |                |           |               |               |              |
|---------------------------|-----------------------|----------------|-----------|---------------|---------------|--------------|
|                           | Total                 | 72.832         | 19        |               |               |              |
| $\delta^{13}\text{C}$ LYS | <b>Between Groups</b> | <b>31.914</b>  | <b>1</b>  | <b>31.914</b> | <b>7.947</b>  | <b>.011*</b> |
|                           | <b>Within Groups</b>  | <b>72.286</b>  | <b>18</b> | <b>4.016</b>  |               |              |
|                           | <b>Total</b>          | <b>104.200</b> | <b>19</b> |               |               |              |
| $\delta^{13}\text{C}$ PHE | <b>Between Groups</b> | <b>47.761</b>  | <b>1</b>  | <b>47.761</b> | <b>21.788</b> | <b>.000*</b> |
|                           | <b>Within Groups</b>  | <b>39.458</b>  | <b>18</b> | <b>2.192</b>  |               |              |
|                           | <b>Total</b>          | <b>87.220</b>  | <b>19</b> |               |               |              |
| $\delta^{13}\text{C}$ ARG | Between Groups        | 17.835         | 1         | 17.835        | 3.215         | .090         |
|                           | Within Groups         | 99.841         | 18        | 5.547         |               |              |
|                           | Total                 | 117.677        | 19        |               |               |              |
